# Supplementary material for: Women’s thirty-year contribution to cheetah conservation: An insight into volunteer-based conservation program supported by female scientists
Source: Frontiers journal article supplement (doi:10.3389/fcosc.2022.1028851), 2022-12-06
Supplement: Data_Sheet_1.docx [file Data_Sheet_1.docx]

Appendix 1: Intern and Working guest survey

Name: ________________________________ Nationality: __________________

Age (now): ________ Age (when volunteered): _________________

Occupation: ______________________________________________

1. How did you first learn about the Cheetah Conservation Fund?

_____________________________________________________________________________________________________________________________________________________________________________________________________________________________________________

1. Why did you decided to volunteer/intern at the Cheetah Conservation Fund?

_____________________________________________________________________________________________________________________________________________________________________________________________________________________________________________

1. Did volunteering at the Cheetah Conservation Fund help you go into conservation or helped your career? How?

_____________________________________________________________________________________________________________________________________________________________________________________________________________________________________________

1. What were your motivations to join conservation?

_____________________________________________________________________________________________________________________________________________________________________________________________________________________________________________

1. How difficult was it for you to join conservation?

Very easy / Easy / Neutral / Hard / Very Hard

1. Do you think that conservation is male or female dominated field? MALE / FEMALE
2. Do you feel your company/organisation is male or female dominated? MALE / FEMALE
3. What are some of the challenges of being in conservation as a woman?

_____________________________________________________________________________________________________________________________________________________________________________________________________________________________________________

1. Do you think men have the same challenges?

______________________________________________________________________________________________________________________________________________________________

1. Are you still in conservation? If not, why did you leave?

_____________________________________________________________________________________________________________________________________________________________________________________________________________________________________________

1. What are you doing now?

______________________________________________________________________________________________________________________________________________________________

Thank you for your time to complete this survey. We greatly appreciate the feedback ☺

Appendix B: Earthwatch survey

Name: ___________________________________ Nationality: ______________________

Age (now): ________ Age (when volunteered): _________

Occupation: ______________________________________________

1. Why did you decided to volunteer at the Cheetah Conservation Fund?

_____________________________________________________________________________________________________________________________________________________________________________________________________________________________________________

1. Did you come on a CCF expedition to get more involved with conservation? YES / NO
2. What was your take home message from being at CCF?

_____________________________________________________________________________________________________________________________________________________________________________________________________________________________________________

1. Have you stayed connected with CCF since you volunteered? YES / NO

1. Do you think that conservation is male or female dominated field? MALE / FEMALE
2. What were your motivations to join conservation?

_____________________________________________________________________________________________________________________________________________________________________________________________________________________________________________

1. Have you volunteered with other conservation projects?

_____________________________________________________________________________________________________________________________________________________________________________________________________________________________________________

1. Have you supported conservation with money donations? YES / NO
2. Were the projects more ran by men or women? MEN / WOMEN
3. Was there a difference as to how males approached conservation compared to females? How?

____________________________________________________________________________________________________________________________________________________________________________________________________________________________________________________________________________________________________________________________

1. Do you feel your company/organisation is male or female dominated? MALE / FEMALE
